# Supplementary material for: Application of spatial transcriptome technologies to neurological diseases
Source: Front Cell Dev Biol. 2023 Mar 3;11:1142923. doi: 10.3389/fcell.2023.1142923 (PMC10020196; doi:10.3389/fcell.2023.1142923)
Supplement: Supplementary file 1 [file Table1.DOCX]

Supplementary Material

Application of spatial transcriptome technologies to neurological diseases

Dongshan Ya 1,2, Yingmei Zhang1,2, Qi Cui1,2, Yanlin Jiang3, Jiaxin Yang1,2, Ning Tian1,4, Wenjing Xiang5, Xiaohui Lin6, Qinghua Li1,2,4, and Rujia Liao1,2,4*

*** Correspondence:** Rujia Liao: liaorujia@hotmail.com

# Supplementary Table

**Table 1. A summary of the technical parameters for the mentioned spatial transcriptomic technologies**

| **Method** | **Sample type** | **Approach** | **Spatial resolution** | **Throughput (cells or spots)** | **Gene detection level (depth)** | **Advantages** | **Restrictions** |
| --- | --- | --- | --- | --- | --- | --- | --- |
| LCM-seq | FF or FFPE | Transcriptome-wide | Cellular | 1 | ~10 000 genes | Robust | Low throughput |
| Geo-seq | FF or FFPE | Transcriptome-wide | Cellular | 1 | ~8000 genes | More sensitive than LCM-seq | Low throughput |
| Tomo-seq | FF or FFPE | Transcriptome-wide | Anatomical features | N/A | Whole transcriptome | Construction of 3D profiles | Requires numerous identical biological samples, hence it cannot be applied to human samples |
| TSCS | FF or FFPE | Transcriptome-wide | Cellular | 100 | Whole exome | 10,000 genes can be analyzed | Applied to only 100 cells |
| smFISH | FF or FFPE | Targeted | Subcellular | ~100 | 3 genes | High detection sensitivity | Low throughput |
| seqFISH | FF | Targeted | Subcellular | ~200 | 10~250 genes | Highly multiplex | Need specialized equipment;  Cost increases significantly as the number of targets rises; Limited field of view |
| seqFISH+ | FF | Targeted | Subcellular | 2963 | 10,000  genes | Exceedingly high multiplex | Cost increases significantly as the number of targets rises; Limited field of view |
| MERFISH | FF | Targeted | Subcellular | Tens of  thousands | 100~10,050  genes | Highly multiplex | Need specialized equipment; Cost increases significantly as the number of targets rises |
| split-FISH | FF | Targeted | Subcellular |  | ~300 genes | Reduced false positive rate | High experimental costs |
| FISSEQ | FF or FFPE | Transcriptome-wide | Subcellular | Hundreds | ~8,000 genes | Non-targeted | Low sensitivity  Limited field of view |
| Baristaseq | Cell cultures | Targeted | Subcellular | 206 | ~200 genes | Apply SBS instead of SBL allow read out of up to 15 nt of actual target sequence | A priori chosen targets of limited quantity  Limited field of view |
| STARmap | Fresh or FF | Targeted | Subcellular | ~1000 | ~1 000 genes | Increased sensitivity due to probe-complex, absence of a RT step and tissue transparency | A priori chosen targets of limited quantity;  Limited field of view |
| BOLORAMIS | Cell cultures | Targeted | Subcellular | N/A | 96 genes | Highly multiplex, removes the need for RT, the shortest foot-print needed for detecting transcripts is 25 nt | Spatial crowdedness when targeting many genes, quantify the low level of relative gene expression |
| ST | FF | Transcriptome-wide | 50/100 μm | ~280 | ~5,000 genes | Whole-mRNA analysis | Barcoded regions contain multiple cells; Not single-cell resolution |
| Slide-Seq | FF | Transcriptome-wide | 10 μm | ~70,000 | ~20,000 genes | High resolution | Does not include histology on the same tissue section and has low sensitivity |
| HDST | FF | Transcriptome-wide | 2 μm | ~160 000 | ~17,000 genes | High resolution | Sparse data requires binning, Low sensitivity |
| DBiT-seq | Formaldehyde fixed or frozen | Transcriptome-wide | 10/25/50  μm mosaic grid | N/A | Whole  transcriptome | Flexibility, high spatial resolution co-mapping of proteins | Risk of lateral expansion of barcode |
| Seq-Scope | FF | Transcriptome-wide | 0.5–0.8 μm distant cluster | N/A | Whole  transcriptome | High resolution | Require spatial barcode sequencing |
| Light-Seq | Cell cultures | Transcriptome-wide | <2 µm | 4–1000+ | Whole  transcriptome | Full-transcriptome sequencing based on location, morphology or protein stains, without cellular dissociation; For rare cell populations | the number of addressable regions is currently limited |
| TIVA | Live cells | Transcriptome-wide | Cellular | 1 | ~9000 genes | Can be performed on live cells | Cannot be applied to human tissue |
| Zipseq | Live cells | Transcriptome-wide | Cellular | 0-100 | ~23 000 genes | Can be performed on live cells; Ability to analyze protein; Combinatorial zipcode | Complexity and hybridization efficiency of combinatorial zipcode; Positional details lack |
| APex-seq | Live cells | Transcriptome-wide | Subcellular | N/A | N/A | Can be performed on live cells | Cannot be applied to human tissue |

Fresh frozen samples (FF); Formalin-fixed and paraffin-embedded samples (FFPE), Not available (N/A).

**
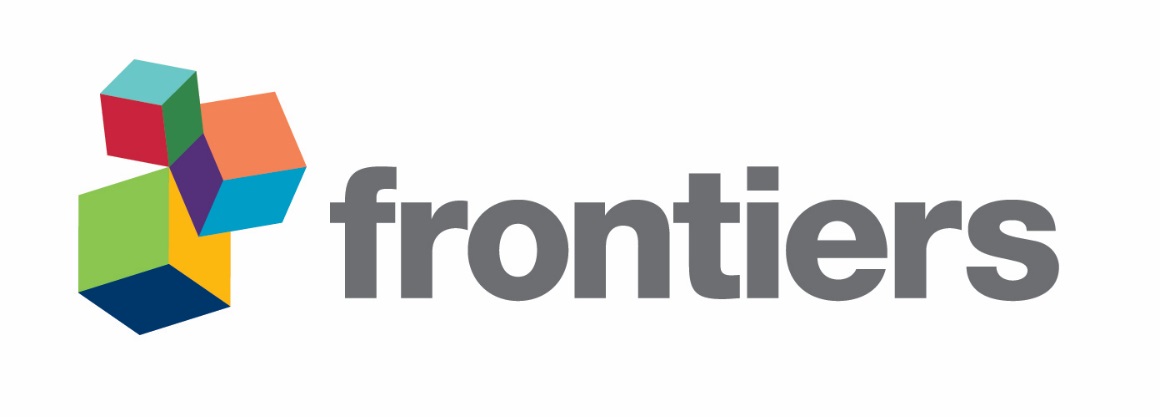
**
